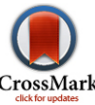

# Protection Motivation Theory in Predicting Intention to Engage in Protective Behaviors against *Schistosomiasis* among Middle School Students in Rural China

Han Xiao<sup>1,2,3</sup>, Shiyue Li<sup>1,3,3</sup>, Xinguang Chen<sup>1,3,4</sup>, Bin Yu<sup>1,3,4</sup>, Mengting Gao<sup>1,3</sup>, Hong Yan<sup>1,3\*</sup>, Chukwuemeka N. Okafor<sup>4</sup>

**1** School of Public Health, Wuhan University, Wuhan, Hubei, China, **2** Xuanwu Hospital, Capital Medical University, Beijing, China, **3** Global Health Institute, Wuhan University, Wuhan, Hubei, China, **4** Department of Epidemiology, University of Florida, Gainesville, Florida, United States of America

## Abstract

**Background:** Among millions of people who suffer from *schistosomiasis* in China, adolescents are at increased risk to be infected. However, there is a lack of theory-guided behavioral prevention intervention programs to protect these adolescents. This study attempted to apply the Protection Motivation Theory (PMT) in predicting intentions to engage in protective behaviors against *schistosomiasis* infection.

**Methods:** The participants were selected using the stratified cluster sampling method. Survey data were collected using anonymous self-reported questionnaire. The advanced structural equation modeling (SEM) method was utilized to assess the complex relationship among *schistosomiasis* knowledge, previous risk exposure and protective measures in predicting intentions to engage in protective behavior through the PMT constructs.

**Principal Findings:** Approximately 70% of participants reported they were always aware of *schistosomiasis* before exposure to water with endemic *schistosomiasis*, 6% of the participants reported frequency of weekly or monthly prior exposure to snail-conditioned water. 74% of participants reported having always engaged in protective behaviors in the past three months. Approximately 7% were unlikely or very unlikely to avoid contact with snail-conditioned water, and to use protective behaviors before exposure. Results from SEM analysis indicated that both *schistosomiasis* knowledge and prior exposure to *schistosomiasis* were indirectly related to behavior intentions through intrinsic rewards and self-efficacy; prior protective behaviors were indirectly related to behavior intentions through severity, intrinsic rewards and self-efficacy, while awareness had an indirect relationship with behavior intentions through self-efficacy. Among the seven PMT constructs, severity, intrinsic rewards and self-efficacy were significantly associated with behavior intentions.

**Conclusions:** The PMT can be used to predict the intention to engage in protective behaviors against *schistosomiasis*. *Schistosomiasis* intervention programs should focus on the severity, intrinsic rewards and self-efficacy of protection motivation, and also increase the awareness of infection, and enrich the contents of *schistosomiasis* education.

**Citation:** Xiao H, Li S, Chen X, Yu B, Gao M, et al. (2014) Protection Motivation Theory in Predicting Intention to Engage in Protective Behaviors against *Schistosomiasis* among Middle School Students in Rural China. PLoS Negl Trop Dis 8(10): e3246. doi:10.1371/journal.pntd.0003246

**Editor:** Peter J. Hotez, Texas Children's Hospital, National School of Tropical Medicine, United States of America

**Received:** May 14, 2014; **Accepted:** September 5, 2014; **Published:** October 16, 2014

**Copyright:** © 2014 Xiao et al. This is an open-access article distributed under the terms of the Creative Commons Attribution License, which permits unrestricted use, distribution, and reproduction in any medium, provided the original author and source are credited.

**Data Availability:** The authors confirm that all data underlying the findings are fully available without restriction. All relevant data are within the paper and its Supporting Information files.

**Funding:** The authors received no specific funding for this work.

**Competing Interests:** The authors have declared that no competing interests exist.

\* Email: yanhmjxr@aliyun.com

These authors contributed equally to this work

## Introduction

Prevention of *schistosomiasis* has been a significant public health challenge in tropical and subtropical regions of the world. *Schistosomiasis* epidemic has been recorded in 80 countries, and more than 240 million people are infected and 700 million are susceptible [1,2]. The global disability-adjusted life years (DALY) attributed to *schistosomiasis* exceeded 70 million in 2008 [3]. Data collected in China in 2011 reported that 286,836 people were infected with *schistosomiasis*, and 30,028 patients were diagnosed with advanced *schistosomiasis*. A recent report estimated that

about 372,644.10 hectares of areas in China was infested with *Oncomelania* snail, a species of snail known to be the primary vector for *schistosomiasis* [4].

Because of the lack of the acquired immunity, adolescents tend to have higher infection rates than adults [5,6]. One study in Uganda found that the prevalence rate and the severity of *schistosomiasis* infection often peaked between 10 and 14 years of age and then declines with increasing age [7]. This results are consistent with reports from South Sudan where children aged 10–14 years have the highest infection rate, in addition, school-aged children (6–15 years) were being more likely to be infected than

## Author Summary

In China, millions of population suffer from *schistosomiasis* infection and adolescents tend to have higher infection rates than adults. The Knowledge-Attitude-Practice (KAP) Theory has traditionally been used as guidance to *schistosomiasis* prevention in China. However, despite increases in knowledge among residents in the epidemic areas due to KAP theory-based *schistosomiasis* health education, no significant reduction in water-contact behavior was evident. Therefore, it is of crucial importance to seek alternative health behavior change theories/models that are more effective than the KAP theory to promote purposeful behavioral change. The Protection Motivation Theory (PMT) as a social cognitive model may be an alternative to the KAP theory. In this study, we found that the PMT can be used to predict intention to engage in protective behaviors against *schistosomiasis* infection among middle school students in rural China. Based on the PMT, in addition to enhancing awareness of *schistosomiasis* infection, intervention programs should focus on the severity, intrinsic rewards and self-efficacy of protection motivation.

those who are older than 15 years [8]. Furthermore, a longitudinal study in China revealed that despite treatment with *praziquantel*, re-infection rates also remain high among children and young adolescents [9]. The national survey conducted in China in 2006 indicated that 49.3% of acute *schistosomiasis* infection were among those who were 7–18 years of age [10].

The spread of *schistosomiasis* is essentially behavior-related, because humans can only be infected via contact with snail-conditioned water [11]. Many environmental and socioeconomic conditions can influence the spread of *schistosomiasis*, such as raining climate, playing in the water as part of children's daily activities, agricultural economy exposing parents and children in infested water, lack of education and income, however the most modifiable risk factor for *schistosomiasis* infection is behavior [12–14].

Since 2005, rigorous and comprehensive measures have been taken to control the epidemic of *schistosomiasis* in China, including the control of snails and snail-conditioned water, improving sanitation by supplying tap water, replacement of bovine with machines for farming, and patient treatment [15–17]. However, some challenges still exist for the implementation of these measures in some rural areas, such as farm land unsuitable for tractor farming, economical considerations of bovines beyond their use in farming and low drug efficacy [18,19]. Therefore, in this case, behavioral prevention such as avoiding contact with snail-conditioned water or taking protective measures is much more important for blocking the transmission of *schistosomiasis*. However, behavioral prevention has not been emphasized, particular in adolescents. An observational study in rural Brazil indicated that among 160 children participants, 96 had contacted with water in a week (3.2 contacts per person per day), and 64% of the contact where in snail-conditioned water [12]. Furthermore, a study in Zimbabwe reported that 87.9% of students do not know the appropriate protective behavioral measures for *schistosomiasis* prevention [20]. One study along the *Yangtze River* in China indicated that among young fishermen, 56.8% do not use protective measures correctly [21]. Findings from these studies strongly suggest the need to enhance behavioral preventive measures in the population of adolescent.

The Knowledge-Attitude-Practice (KAP) Theory has traditionally been used as guidance to *schistosomiasis* prevention in China. This approach emphasizes the knowledge of, correct attitudes towards *schistosomiasis* and practical skills to reduce the likelihood of making contact with snail-conditioned water [22–26]. One experimental study indicated that receiving a health education program reduced contact with snail-conditioned water from 14.5% at the baseline to 1.8% at one-year follow-up, and the corresponding infection rate from 13.9% to 2.2% among students in a heavy epidemic rural area around the *Poyang Lake* [22]. However, findings in this study have never been repeated. On the contrary, reported studies frequently show that numerous people who have adequate knowledge of and correct attitudes toward *schistosomiasis* do not engage in any protective behavior [23–29]. Furthermore, study findings also reveal that despite increases in knowledge among residents in the epidemic areas due to KAP theory-based *schistosomiasis* health education, no significant reduction in water-contact behavior and *schistosomiasis* infection have been evident [28,29].

The phenomenon of “knowledge-practice” separation [30,31] described above encouraged many researchers to seek for alternative theories/models that are more effective than the KAP theory to promote purposeful behavioral change. Some researchers suggest that there is an imbalance between knowledge accumulation and behavioral change; therefore increases in knowledge alone may not be adequate to change a person's attitude and behaviors [32]. In addition, cognitive process may play a key role in the process of decision-making, leading to behavioral change [31].

A review of intervention research literature indicated that the Protection Motivation Theory (PMT) [33–35] has been frequently used in HIV prevention research [36–38]. The PMT was first introduced by Rogers [33] to understand mechanisms by which people adopt protective behaviors to reduce perceived threat. This model has been revised several times with improved capacity in predicting health-related behaviors [39–43]. As a social cognitive model, PMT consists of seven constructs organized as two pathways linking perceptions to behavior (Figure 1). (1) *The threat appraisal pathway* - an evaluation of a person's perception of the threat of certain behaviors or diseases; and (2) *The coping appraisal pathway* - an evaluation of a person's ability to copy with the threat. The threat appraisal pathway consists of four constructs in two groups, with one group assessing perceived threat using two subconstructs (severity, and vulnerability) and another group assessing the perceived rewards also using two subconstructs (i.e. intrinsic rewards and extrinsic rewards). Coping appraisal pathway consists of three subconstructs in two groups, with one group assessing perceived efficacy with two subconstructs (i.e. response efficacy and self-efficacy) and another assessing perceived costs (i.e. response costs).

The PMT may be an alternative to the KAP, because it integrates cognitive process with information, knowledge, attitudes to behavior intentions and further to behaviors [39]. The objective of this study was to investigate the applicability of the PMT in understanding the *schistosomiasis*-related knowledge, experiences, attitudes and behavior among young students in China. We hypothesize that *schistosomiasis* knowledge and awareness of *schistosomiasis*, prior exposure to snail-conditioned water, and engagement in protective behaviors will be associated with the PMT constructs, while PMT constructs will predict intentions to engage in protective behaviors. Our purpose is to provide new data supporting theory-based and more effective behavioral interventions for primary prevention of the *schistosomiasis* epidemic.

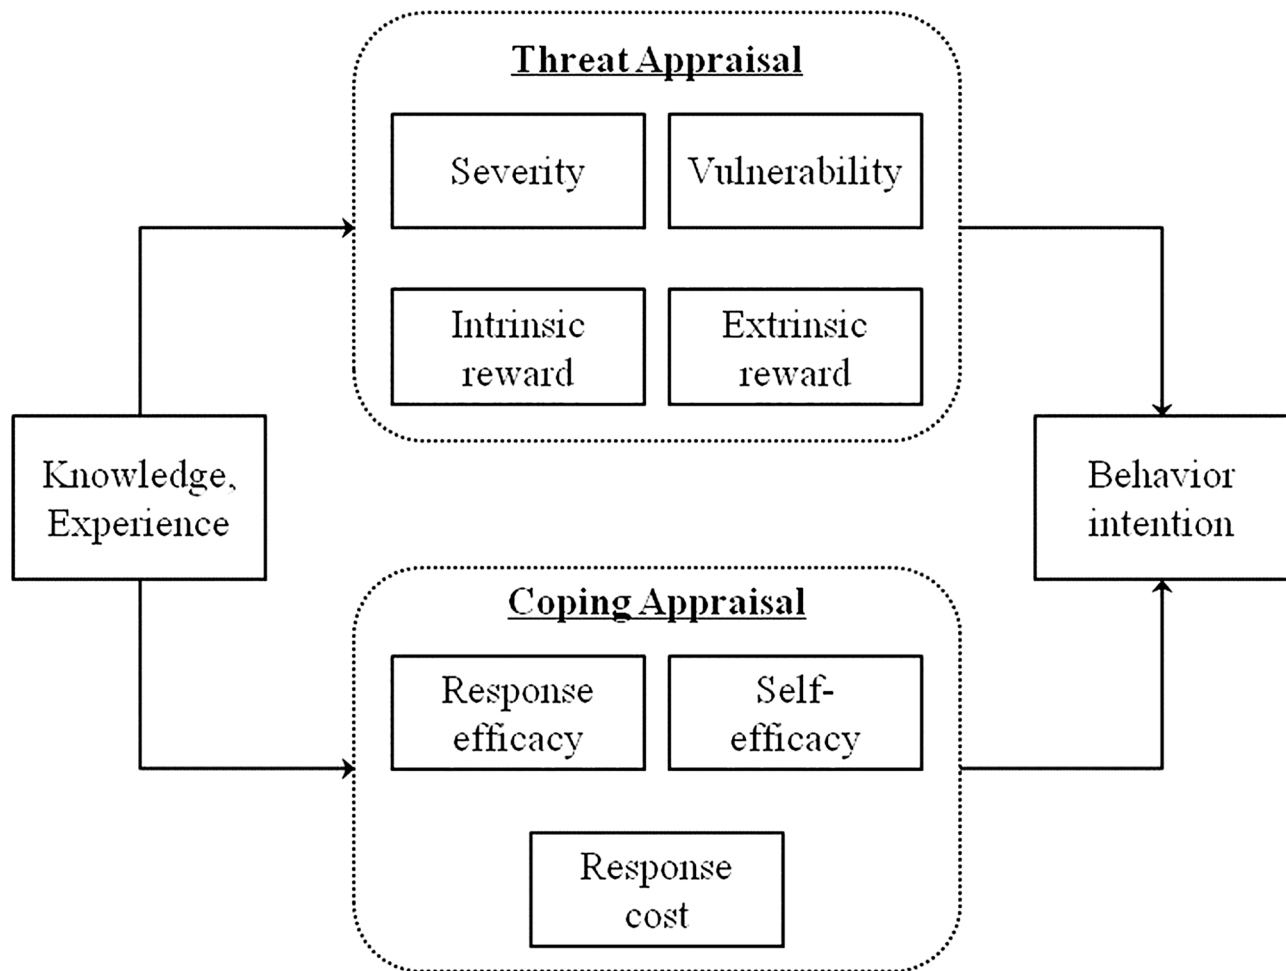

**Figure 1. Schematic presentation of the Protection Motivation Theory (PMT) and its seven subconstructs.** PMT consists of seven constructs organized as two pathways (i.e. the threat appraisal pathway and the coping appraisal pathway) linking perceptions to behavior. The threat appraisal pathway consists of four constructs in two groups (severity and vulnerability, intrinsic rewards and extrinsic rewards). Coping appraisal pathway consists of three subconstructs in two groups (response efficacy and self-efficacy, response costs). doi:10.1371/journal.pntd.0003246.g001

## Materials and Methods

### Ethics statement

The survey protocol was approved by Institutional Review Board at Wuhan University, China. The written consent was obtained from all students who participated in the study and their parents or guardians.

### Participants and sampling

Data were collected between September and October 2013. Participants were students attending middle school at grade 1 through grade 3. Schools were selected from a high epidemic rural area in Hubei Province, China. Hubei is located in central China, it represents one of the provinces with the highest incidence rates (1.01%) of *schistosomiasis* and the largest number of at-risk population totaling 9.78 million [44]. Data from Hubei Provincial Center for Disease Control and Prevention (CDC) indicate that the number of middle school students with *schistosomiasis* accounts for 51.87% of the total infections [44].

Participants were sampled using a three-step stratified cluster sampling method. In step I: The total 41 epidemic counties in Hubei Province were divided into two strata, stratum one

consisting of 19 counties with stool positive rates 1–5%, and stratum two consisting of 22 counties with stool positive rates <1% [45]. Two counties were randomly selected from each stratum, yielding a total of four counties. In step II: two townships were randomly selected from each of the four selected counties in the Step I, yielding a total of eight townships. Within each of the eight selected township, one school with middle school students were randomly selected and invited to participate. In step III: Students in middle school grades 1 to 3 in the participating schools were randomly sampled by class with three classes per grade, yielding a total of 72 classes covering grades 1 to 3 from all the eight participation schools.

All the students in the sampled classes were invited to participate and no student refused to participate. Among the total 2,796 participants who provided data, 274 (9.80%) who responded negatively to the question, “Do you know what is *schistosomiasis*?” were excluded. Among the remaining 2,522 participants, 284 (10.20%) were excluded because of missing data on key variables (age, gender, perceptions of harm from *schistosomiasis*), yielding a final sample of 2238 (80.0%). There was no significant difference in the key study variables among those who were excluded and those included in the study.

**Table 1.** Characteristics of the study sample.

| Variables                     | Male         | Female       | Total         |
|-------------------------------|--------------|--------------|---------------|
| <b>Total, n (%)</b>           | 1138 (50.85) | 1100 (49.15) | 2238 (100.00) |
| <b>Chronological age</b>      |              |              |               |
| Mean (SD)                     | 13.22 (1.12) | 13.03 (1.07) | 13.13 (1.10)  |
| <b>School grade, n (%)</b>    |              |              |               |
| Year 1                        | 359 (31.55)  | 339 (30.82)  | 698 (31.19)   |
| Year 2                        | 415 (36.46)  | 410 (37.27)  | 825 (36.86)   |
| Year 3                        | 364 (31.99)  | 351 (31.91)  | 715 (31.95)   |
| <b>If single child, n (%)</b> |              |              |               |
| Yes                           | 702 (61.69)  | 500 (45.45)  | 1202 (53.71)  |
| No                            | 436 (38.31)  | 600 (54.55)  | 1036 (46.29)  |
| <b>Father's education</b>     |              |              |               |
| Primary or less               | 160 (14.06)  | 160 (14.55)  | 320 (14.30)   |
| Middle school                 | 742 (65.20)  | 719 (65.36)  | 1461 (65.28)  |
| High school or more           | 236 (20.74)  | 221 (20.09)  | 457 (20.42)   |
| <b>Mother's education</b>     |              |              |               |
| Primary or less               | 223 (19.60)  | 241 (21.91)  | 464 (20.73)   |
| Middle school                 | 705 (61.95)  | 672 (61.09)  | 1377 (61.53)  |
| High school or more           | 210 (18.45)  | 187 (17.00)  | 397 (17.74)   |

doi:10.1371/journal.pntd.0003246.t001

## Data collection

Access to each sampled school was obtained from the school administration with the assistance of the local Anti-Schistosomiasis Stations in the sampled county. Data were collected in the classroom settings using the pencil-paper questionnaires. We developed the questionnaire specifically for this study. The developed questionnaire was pilot-tested before it was finalized for the data collection. It took approximately 20 minutes for most students to complete the survey.

The survey was administrated by eight trained data collectors. These data collectors were graduate students from School of Public Health, Wuhan University. To reduce data-collector bias, these graduate students received two-day training. To facilitate completion of the questionnaire, the eight trained data collectors each were assisted by one staff from the local county Anti-Schistosomiasis Stations who was familiar and had good working relationship with the sampled school and students. The staffs from the local Anti-Schistosomiasis Station were responsible to gather the students in a designate classroom. The trained data collectors collected the parental permits and students' informed consents first and then distributed the questionnaires to individual students. The survey was anonymous and confidential. The students were asked to complete the questionnaires independently. They were also allowed to skip questions they did not want to answer. After a student completed the survey, he or she was instructed to hand in the questionnaire to the data collector.

## Measures

**Knowledge of schistosomiasis.** Knowledge of *schistosomiasis* was assessed using an 8-item scale. These items assess whether a student knows if humans can be infected with *schistosomiasis* by making contact with snail-conditioned water, whether they knew the routes of transmission, intermediate host, animals that may be infected, the negative health consequence of chronic and advanced *schistosomiasis*, and children's infection. Cronbach's alpha of the

knowledge scale was 0.66. Participants earned one point score for each correct answer to the 8 questions and the total score was computed such that larger scores indicated higher levels of knowledge regarding *schistosomiasis* infection.

**Awareness of schistosomiasis and exposure to snail-conditioned water.** Participants were asked how frequently they thought about *schistosomiasis* infection before they were exposed to snail-conditioned water in the past 3 months (awareness), responses were coded as (0 = never, 1 = occasionally, 2 = often, and 3 = always). Frequency of exposure to snail-conditioned water in the past 3 months was assessed as: 0 = never if reported "never contacted with snail-conditioned water in the past 3 months"; 1 = less than once a month if reported exposure of "less than one time per month"; 2 = monthly if exposed "1–3 times per month", and 3 = weekly if exposed "once a week or more".

**Previous protective behaviors and future behavioral intentions.** Participants were asked how frequently they took preventive measures for *schistosomiasis* (0 = never, 1 = occasionally, 2 = often, and 3 = every time) when they made contact with an infested water in the past 3 months and the past 6 months (protective behavior). Participants were also asked to rate their intentions to engage in protective behaviors against *schistosomiasis* in the next 3 months and next 12 months (behavior intention) using two questions. (1) "I am sure I will not make contact with snail-conditioned water in the next three months and next 12 months." and (2) "If I have to make contact with snail-conditioned water in the next 3 months and next 12 months, I am sure I will take protective measures." A 5-point Likert scale was used to assess the two questions with options of 1 = very unlikely to 5 = very likely. Mean scores of the two questions were computed for modeling analysis.

**The Schistosomiasis PMT Scale.** We developed the *Schistosomiasis* PMT Scale for this study through team effort. With the coordination of the Principal Investigator Shiyue Li,

**Table 2.** Knowledge and awareness of *schistosomiasis* and exposure to snail-conditioned water.

| Items                                                                               | Male        | Female       | Total        |
|-------------------------------------------------------------------------------------|-------------|--------------|--------------|
| <b>Schistosomiasis knowledge</b>                                                    |             |              |              |
| Scale score, Mean (SD)                                                              | 6.66 (1.62) | 6.59 (1.57)  | 6.63 (1.59)  |
| <b>Awareness of <i>schistosomiasis</i> before exposure to epidemic water, n (%)</b> |             |              |              |
| Never                                                                               | 158 (13.88) | 98 (8.91)    | 256 (11.44)  |
| Occasionally                                                                        | 170 (14.94) | 120 (10.91)  | 290 (12.96)  |
| Often                                                                               | 81 (7.12)   | 55 (5.00)    | 136 (6.07)   |
| Always                                                                              | 729 (64.06) | 827 (75.18)  | 1556 (69.53) |
| <b>Frequency of exposure to snail-conditioned water, last 3 months, n (%)</b>       |             |              |              |
| Weekly                                                                              | 46 (4.04)   | 19 (1.73)    | 65 (2.90)    |
| Monthly                                                                             | 38 (3.34)   | 29 (2.63)    | 67 (3.00)    |
| Less than once a month                                                              | 97 (8.53)   | 45 (4.09)    | 142 (6.34)   |
| Never                                                                               | 957 (84.09) | 1007 (91.55) | 1964 (87.76) |
| <b>Frequency of exposure to snail-conditioned water, last 6 months, n (%)</b>       |             |              |              |
| Weekly                                                                              | 45 (3.95)   | 46 (4.18)    | 91 (4.07)    |
| Monthly                                                                             | 76 (6.68)   | 58 (5.27)    | 134 (5.98)   |
| Less than once a month                                                              | 187 (16.44) | 152 (13.82)  | 339 (15.15)  |
| Never                                                                               | 830 (72.93) | 844 (76.73)  | 1674 (74.80) |
| <b>Engaging in protective behavior, last 3 months, n (%)</b>                        |             |              |              |
| Never                                                                               | 165 (14.50) | 113 (10.27)  | 278 (12.42)  |
| Occasional                                                                          | 104 (9.14)  | 83 (7.55)    | 187 (8.36)   |
| Often                                                                               | 71 (6.24)   | 42 (3.82)    | 113 (5.05)   |
| Every time                                                                          | 798 (70.12) | 862 (78.36)  | 1660 (74.17) |
| <b>Engaging in protective behaviors, last 6 months, n (%)</b>                       |             |              |              |
| Never                                                                               | 159 (13.97) | 119 (10.82)  | 278 (12.42)  |
| Occasional                                                                          | 129 (11.34) | 84 (7.64)    | 213 (9.52)   |
| Often                                                                               | 86 (7.55)   | 46 (4.18)    | 132 (5.90)   |
| Every time                                                                          | 764 (67.14) | 851 (77.36)  | 1615 (72.16) |

doi:10.1371/journal.pntd.0003246.t002

team members proposed a number of items for each of the seven PMT subconstructs through literature review and brainstorming. Group discussion was followed to select items. When developing the PMT scale, we considered (a) face validity – different items for a subconstruct must all be directly related to that construct; (b) balanced items by subconstruct – similar number of items for each of all the subconstructs; (c) maximization of Chronbach alpha coefficient as a reliability measure.

The final version of PMT scale consists of 20 items assessing the seven PMT subconstructs. (1) The *vulnerability* was defined as perceived likelihood to be infected by schistosomiasis and was assessed using three items (Cronbach  $\alpha = 0.82$ ). (2) The *severity* was defined as perceived negative consequences from *schistosomiasis* and was measured with three items (Cronbach  $\alpha = 0.48$ ). (3) The *intrinsic rewards* was defined as perceived physical and psychological benefits from playing with (snail-conditioned) water and was assessed using three items (Cronbach  $\alpha = 0.75$ ). (4) The *extrinsic rewards* was defined as perceived social benefits from playing with (snail-conditioned) water, and was assessed using three items (Cronbach  $\alpha = 0.79$ ). (5) The *response efficacy* was defined as the perceived effectiveness of preventive measures in protecting a person from *schistosomiasis* infection, and was assessed using three items (Cronbach  $\alpha = 0.63$ ). (6) The *self-efficacy* was defined as personal beliefs in one's own ability to

adopt specific protective behaviors against *schistosomiasis* and was assessed using three items (Cronbach  $\alpha = 0.71$ ). And, (7) The *response costs* was defined as perceived costs incurred by adapting any protective behaviors, and was assessed using two items (Cronbach  $\alpha = 0.69$ ).

The 20 individual PMT items were assessed using the 5-level response scale with 1 = “definitely agree” to 5 = “definitely disagree”. We purposefully put the negative responses before the positive responses to avoid cohesive answers. Item scores were recorded such that higher scores indicating more agreement to the individual statements. Mean scores were computed for individual subconstructs for statistical analyses.

**Demographic variables.** Demographic data included chronological age (in years), gender (male and female), school grade (grade 1, grade 2, grade 3), if they were a single child (yes/no), parental education (middle school or less, high school, college or more). In addition to describing the study sample, these variables were used in multivariate analysis.

#### Data processing and statistical analysis

Survey data were manually entered into a computer after quality check using the EpiData software. The double-entry protocol was imposed to minimize data-entry errors. Discrepancies from double entries were resolved by consulting the hardcopies of

**Table 3.** Intention to engage in *schistosomiasis* protective behaviors.

| Behavior intentions                                                                   | Male        | Female      | Total        |
|---------------------------------------------------------------------------------------|-------------|-------------|--------------|
| <b>Short-term (3 months) intention</b>                                                |             |             |              |
| <b>Likelihood to avoid contacting with snail-conditioned water</b>                    |             |             |              |
| Very unlikely                                                                         | 45 (3.95)   | 38 (3.45)   | 83 (3.71)    |
| Unlikely                                                                              | 37 (3.26)   | 31 (2.82)   | 68 (3.04)    |
| Don't know/unsure                                                                     | 240 (21.09) | 173 (15.73) | 413 (18.45)  |
| Likely                                                                                | 197 (17.31) | 197 (17.91) | 394 (17.61)  |
| Very likely                                                                           | 619 (54.39) | 661 (60.09) | 1280 (57.19) |
| <b>Likelihood to use protection if having to contact with snail-conditioned water</b> |             |             |              |
| Very unlikely                                                                         | 49 (4.31)   | 33 (3.00)   | 82 (3.66)    |
| Unlikely                                                                              | 32 (2.81)   | 39 (3.55)   | 71 (3.18)    |
| Don't know/unsure                                                                     | 272 (23.90) | 197 (17.91) | 469 (20.95)  |
| Likely                                                                                | 247 (21.70) | 243 (22.09) | 490 (21.90)  |
| Very likely                                                                           | 538 (47.28) | 588 (53.45) | 1126 (50.31) |
| <b>Long-term (12 months) intention</b>                                                |             |             |              |
| <b>Likelihood to avoid contacting with snail-conditioned water</b>                    |             |             |              |
| Very unlikely                                                                         | 48 (4.22)   | 36 (3.27)   | 84 (3.75)    |
| Unlikely                                                                              | 41 (3.60)   | 34 (3.09)   | 75 (3.35)    |
| Don't know/unsure                                                                     | 301 (26.45) | 226 (20.55) | 527 (23.55)  |
| Likely                                                                                | 210 (18.45) | 184 (16.73) | 394 (17.61)  |
| Very likely                                                                           | 538 (47.28) | 620 (56.36) | 1158 (51.74) |
| <b>Likelihood to use protection if having to contact with snail-conditioned water</b> |             |             |              |
| Very unlikely                                                                         | 53 (4.66)   | 42 (3.82)   | 95 (4.24)    |
| Unlikely                                                                              | 45 (3.95)   | 34 (3.09)   | 79 (3.53)    |
| Don't know/unsure                                                                     | 292 (25.66) | 223 (20.27) | 515 (23.01)  |
| Likely                                                                                | 221 (19.42) | 227 (20.64) | 448 (20.02)  |
| Very likely                                                                           | 527 (46.31) | 574 (52.18) | 1101 (49.20) |

doi:10.1371/journal.pntd.0003246.t003

the originally completed questionnaires. Descriptive statistics were used to summarize the sample characteristics. Cronbach alpha was computed to assess the reliability of the PMT subconstructs and other scale measures. Pearson correlation coefficients were computed to assess the relationship among the variables for structural equation modeling analysis. A path modeling approach was used to assess the proposed structural relationship among the PMT subconstructs and other variables. In conducting the path modeling analysis, data-model fitting was assessed using the following four indices: GFI (>0.9), CFI (>0.9), RMSEA (< 0.05) and Chi-square/df (<2) [41]. Statistical analyses were completed using the software SAS version 9.2 (SAS Institute Inc. Cary, NC).

## Results

### Sample characteristics

The demographic characteristics of the study sample are displayed in Table 1. Among the total 2,238 students, 1,138 (51%) were male, 31% were in grade one, 37% were grade two, 32% were in grade three, 54% reported that they were a single child in their family. Mean age of the sample was 13 years (SD = 1.1). Most participants reported their parental and maternal educational level to be middle school level, 66% and 62% respectively.

### Knowledge and awareness of *schistosomiasis* and exposure to snail-conditioned water

The mean score of *schistosomiasis* knowledge is 6.63 (SD = 1.59) with no significant gender differences ( $t = 0.97$ ,  $p = 0.33$ ; Table 2). Approximately 70% of participants reported they were always aware of *schistosomiasis* before exposure to the epidemic water. Only 6% of the participants reported frequency of weekly or monthly prior exposure to snail conditioned water. Finally, 74% of participants reported that they engaged in *schistosomiasis* protective behaviors every time when making contact with snail-conditioned water in the past three months.

### Intention to take protective measures

As shown in Table 3, approximately 6.71% and 7.10% of respondents reported that they are either unlikely or very unlikely to avoid contacting with snail conditioned water in the next 3 and 12 months, while 6.84% and 7.77% reported that they are either unlikely or very unlikely to use protection if they make contact with a snail-conditioned water in the next 3 and 12 months respectively.

### Psychometric characteristics of the *Schistosomiasis* PMT scale

The mean and standard deviation of each item in *Schistosomiasis* PMT scale are presented in Table 4. The item to total

**Table 4.** *Schistosomiasis* PMT scale.

| <i>Schistosomiasis</i> PMT scale                                                                                           | Mean (SD)   | Item-total r | Alpha |
|----------------------------------------------------------------------------------------------------------------------------|-------------|--------------|-------|
| <b>Severity</b>                                                                                                            |             |              | 0.48  |
| 1. <i>Schistosomiasis</i> causes big damage to people's health.                                                            | 4.73 (0.60) | 0.26         |       |
| 2. My whole family will suffer if I am infected with <i>schistosomiasis</i> .                                              | 2.87 (1.22) | 0.12         |       |
| 3. I will become hopeless for the rest of my life if I am infected with <i>schistosomiasis</i> .                           | 2.43 (1.16) | 0.07         |       |
| <b>Vulnerability</b>                                                                                                       |             |              | 0.82  |
| 4. I will get infected if I contact snail-conditioned water while assisting my parents to work.                            | 4.32 (0.84) | 0.38         |       |
| 5. I will get infected if I play with or swim in snail-conditioned water.                                                  | 4.39 (0.81) | 0.42         |       |
| 6. If I wade through water or walk in wetland in snail-conditioned areas without protection, I will get infected.          | 4.36 (0.83) | 0.38         |       |
| <b>Intrinsic Reward</b>                                                                                                    |             |              | 0.75  |
| 7. It is very enjoyable for me to play in water outside.                                                                   | 2.05 (1.26) | 0.47         |       |
| 8. It is convenient to wash my hands and feet in rivers and ponds.                                                         | 1.99 (1.25) | 0.50         |       |
| 9. It will be more convenient to assist parents' work or play in snail-conditioned water without protective measures.      | 2.02 (1.31) | 0.44         |       |
| <b>Extrinsic Reward</b>                                                                                                    |             |              | 0.79  |
| 10. Playing in outdoor water with classmates is good for making friends and for strengthening friendship.                  | 1.90 (1.10) | 0.47         |       |
| 11. Washing my hands and feet or clothes in river and ponds will save tap water, save money for my family.                 | 1.93 (1.14) | 0.44         |       |
| 12. It will save money if assisting parents' work or playing in water without protection (water shoes, protective gels).   | 1.72 (1.01) | 0.46         |       |
| <b>Response Efficacy</b>                                                                                                   |             |              | 0.63  |
| 13. I will never be infected if I do not play in snail-conditioned water.                                                  | 2.76 (1.14) | 0.06         |       |
| 14. I will never get infected if I do not assist parents' work in snail-conditioned water.                                 | 2.80 (1.12) | 0.06         |       |
| 15. I will never get infected if I use good protection measures before contacting with snail-conditioned water.            | 4.16 (0.96) | 0.19         |       |
| <b>Self-Efficacy</b>                                                                                                       |             |              | 0.71  |
| 16. I can control myself not to go and play in snail-conditioned water.                                                    | 4.20 (1.02) | 0.26         |       |
| 17. I can definitely say "no" even if my friends invite me to play in snail-conditioned water.                             | 4.47 (0.92) | 0.40         |       |
| 18. I can definitely say "no" even if my parents or teachers ask me to do things that may involve snail-conditioned water. | 4.38 (0.98) | 0.41         |       |
| <b>Response Cost</b>                                                                                                       |             |              | 0.69  |
| 19. My friends may tease me if I refuse to go out with them to play in snail-conditioned water.                            | 2.15 (1.28) | 0.36         |       |
| 20. My parents will scold me if I worry about <i>schistosomiasis</i> and refuse to do things in snail-conditioned water.   | 1.86 (1.15) | 0.33         |       |

doi:10.1371/journal.pntd.0003246.t004

correlations ranged from 0.06 to 0.50, Cronbach's alpha coefficient >0.7 among four of the seven PMT subconstructs and Cronbach's alpha coefficient = 0.76 for the overall PMT Scale.

#### Association between the PMT constructs and behavior measures

Data in Table 5 indicated that (1) all the four predictor variables (knowledge, awareness, prior exposure and engagement in protective behaviors) were intercorrelated at  $p < 0.05$  or  $p < 0.01$  level. (2) All the seven PMT subconstructs were significantly intercorrelated with each at  $p < 0.05$  or 0.01 level with one exception between severity and extrinsic rewards ( $p > 0.05$ ). (3) Five of the seven PMT subconstructs (e.g., vulnerability, intrinsic rewards, extrinsic rewards, self-efficacy and response efficacy) were significantly associated with the four predictor variables (e.g., knowledge, awareness, prior exposure to snail-contained water, and prior engagement in protective behavior). Among the

remaining two subconstructs, severity was significantly associated with prior engagement in protective behavior and future behavior intentions, response efficacy was significantly associated with knowledge and future behavior intentions. (4) The seven PMT subconstructs and the four predictor variables were all significantly associated with intention to engage in protective behaviors ( $p < 0.01$  for all).

#### Results from the structural equation modeling analysis

Results in Figure 2 partially support the proposed structural association that *schistosomiasis* knowledge, awareness of *schistosomiasis* infection, prior exposure to snail-contained water and engagement in protective behavior each are associated with PMT constructs, which in turn are associated with behavior intentions. Our data fit the hypothesized model well (GFI = 0.98, CFI = 0.93, RMSEA = 0.06, Chi-square/df = 8.6). The estimated parameters indicate that the four predictor variables each were significantly associated with at least two of the seven PMT subconstructs at  $p <$

**Table 5.** Correlations of the *schistosomiasis* PMT subconstructs with knowledge and behavioral measures.

| Variable                  | Mean (SD)   | 2           | 3       | 4       | 5       | 6       | 7       | 8       | 9       | 10      | 11      | 12      |
|---------------------------|-------------|-------------|---------|---------|---------|---------|---------|---------|---------|---------|---------|---------|
| 1.Severity                | 3.34 (0.72) | 0.16**      | -0.06** | 0.01    | 0.09**  | 0.06**  | 0.01    | 0.03    | 0.002   | 0.04    | 0.04*   | 0.08**  |
| 2.Vulnerability           | 4.35 (0.71) | -0.23**     | -0.19** | -0.19** | 0.09**  | 0.25**  | -0.19** | 0.28**  | 0.14**  | 0.07**  | 0.15**  | 0.20**  |
| 3.Intrinsic rewards       | 2.02 (1.04) | 0.55**      | 0.05*   | 0.29**  | 0.05*   | -0.25** | 0.29**  | -0.18** | -0.15** | -0.14** | -0.21** | -0.12** |
| 4.Extrinsic rewards       | 1.85 (0.91) | 0.11**      | 0.11**  | 0.37**  | 0.11**  | -0.22** | 0.37**  | -0.19** | -0.13** | -0.14** | -0.17** | -0.12** |
| 5.Response efficacy       | 3.24 (0.82) | 0.04*       | 0.08**  | 0.04*   | 0.11**  | 0.11**  | 0.04*   | 0.08**  | 0.03    | -0.001  | 0.04    | 0.13**  |
| 6.Self efficacy           | 4.35 (0.78) | -0.19**     | 0.11**  | -0.19** | 0.16**  | 0.11**  | -0.19** | 0.11**  | 0.16**  | 0.15**  | 0.20**  | 0.40**  |
| 7.Response cost           | 2.01 (1.06) | 6.63(1.59)  | -0.15** | -0.15** | -0.15** | -0.15** | -0.15** | -0.15** | -0.11** | -0.13** | -0.15** | -0.12** |
| 8.Knowledge               | 2.34 (1.08) | 2.79 (0.63) | 0.09**  | 0.05*   | 0.09**  | 0.05*   | 0.09**  | 0.08**  | 0.08**  | 0.05*   | 0.08**  | 0.10**  |
| 9.Awareness consideration | 2.41 (1.07) | 4.17 (0.97) | 0.25**  | 0.25**  | 0.25**  | 0.25**  | 0.25**  | 0.25**  | 0.25**  | 0.25**  | 0.46**  | 0.15**  |
| 10.Prior exposure         |             |             |         |         |         |         |         |         |         |         | 0.31**  | 0.12**  |
| 11.Protective behavior    |             |             |         |         |         |         |         |         |         |         |         | 0.17**  |
| 12.Behavior intention     |             |             |         |         |         |         |         |         |         |         |         |         |

**Note:** \*\*p<0.01, \*p<0.05.  
doi:10.1371/journal.pntd.0003246.t005

0.01 level. Among the four predictor variables, two (knowledge and engagement in protective behaviors) were associated with six of the seven PMT subconstructs. Among the seven PMT subconstructs, three (severity, intrinsic rewards and self-efficacy) were significantly associated with intentions to engage in protective behavior.

In addition to assess behavior intentions in the next 3 months, longer-term intention was also assessed using the same SEM approach. The results were quite similar to those reported in Figure 2.

**Discussion**

As a social cognitive conceptual framework, the Protection Motivation Theory (PMT) has been widely used in predicting health behaviors [46,47] and in guiding research to devise intervention programs for purposeful behavior change [36–38]. This is the first study to investigate the applicability of PMT in understanding the *schistosomiasis* protective behavior among middle school students in rural China. This *Schistosomiasis* PMT Scale has adequate reliability with Cronbach’s alpha coefficients greater the 0.7 (considered as good) for the overall scale and for most of its subconstructs. The PMT Scale also has adequate validity because in addition to predicting behavioral intentions, the seven PMT subconstructs were associated with all the predictor variables used in this analysis, including previous use of protective measures, knowledge of *schistosomiasis*, awareness of *schistosomiasis* infection, and previous exposure to risk factors.

Despite rapid economic development, *schistosomiasis* remains a public health challenge in many epidemic regions, particularly the rural areas in China and many other developing countries [48–50]. Findings of this study provide evidence supporting the significance of the PMT, a US-developed theory in guiding behavioral research and intervention, for *schistosomiasis* control in China. To our knowledge, PMT theory can be considered as an expansion of Knowledge-Attitude-Practice (KAP) Theory to encompass such components as cognitive appraisal of the risks of *schistosomiasis* infection, and benefits from using protection and self-coping strategies. In addition to information-based education and skills, PMT emphasizes training for decision making by assessing the risks of diseases and benefits from protection, and motivate participants to take protective actions against diseases.

Consistent with the PMT theory, results from correlation and structural equation modeling analysis of this study indicate that *schistosomiasis* knowledge, awareness of infection, prior exposure to snail-contained water, and engagement in protective behaviors are associated with various PMT constructs. This finding suggests that in addition to the cognitive components related to PMT, intervention programs may benefit by considering previous knowledge, experience and cognition of *schistosomiasis* [51]. Relative to students with previous knowledge and protective experience, more efforts may be needed to encourage naive youth to use protection against *schistosomiasis*.

Another key finding of this study is that both the PMT threat appraisal pathway (e.g., the severity and intrinsic rewards) and the PMT coping appraisal pathway (e.g., self-efficacy) are associated with intention to engage in protective behaviors. The role of coping appraisal (particularly self-efficacy) has been reported in intervention studies focused on HIV risk behavior prevention [36–38], and there is a lack of data supporting the role of the threat appraisal. One reason for our findings is that compared to HIV related behaviors (e.g., sexual initiation, use of a condom during sex, use of alcohol and drugs), *schistosomiasis*-related behavior are less likely to be affected by situational and emotional factors.



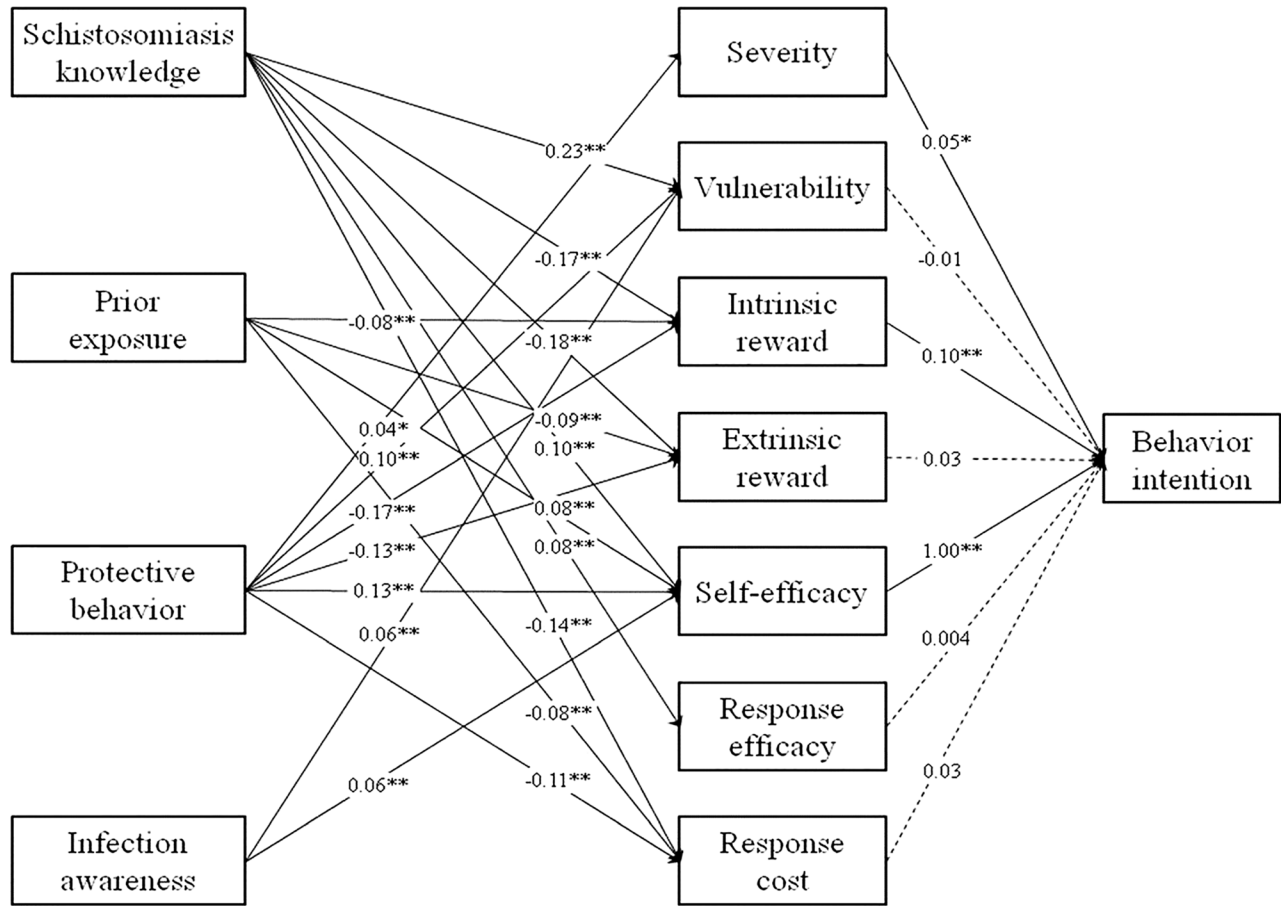

**Figure 2. Structural equation modeling of *schistosomiasis* knowledge, prior exposure, awareness, protective behavior, *schistosomiasis* PMT constructs and behavior intention.** The data-model fit indices: GFI=0.98, CFI=0.93, RMSEA=0.06, Chi-square/df=8.6. \*\*: p<0.01 and \*: p<0.05. doi:10.1371/journal.pntd.0003246.g002

Students may have adequate time to think about the threats of *schistosomiasis* and the pros and cons of using or not using protection. If this is the case, we can anticipate that a PMT-based intervention could be more effective to encourage protective behaviors against *schistosomiasis* than HIV if both the threat appraisal and the coping appraisal are emphasized.

From an applied perspective, the findings from the study suggest that several variables (i.e. severity, intrinsic rewards and self-efficacy), especially self-efficacy, should be targeted in *schistosomiasis* intervention programs for adolescents in order to increase their behavior intentions. First, adolescents’ believe in their ability to avoid contact with snail-conditioned water despite barriers (i.e. self-efficacy) should be improved through providing positive coping messages to enhance their confidence regarding protective behaviors and their belief that protective behaviors provides health benefits. Second, realistic information about disease severity should be concentrated on to increase their perceived level of fear about the disease for promotion acceptance of the proposed adaptive behavior or intention.

This study has some limitations. First, data used for this study was collected through a cross-sectional survey. Therefore the observed relationship between PMT subconstructs and other variables need to be verified through longitudinal studies. Second, although overall the *Schistosomiasis* PMT scale has adequate reliability, the

Chronbach’s alpha coefficients were less than satisfactory for two PMT subconstructs severity (alpha = 0.48) and response efficacy (alpha = 0.63). These relatively low alpha coefficients suggest the need for further work to improve the reliability of these two measures. Despite the limitations, this study is the first to systematically test the utility of a US-developed behavioral theory in describing *schistosomiasis* behavior among middle school students in China. Findings from this study add novel data supporting more effective *schistosomiasis* prevention interventions.

**Supporting Information**

**Checklist S1** STROBE Checklist. (DOC)

**Acknowledgments**

We would like to thank the study participants and their families, and the staff from the local Anti-Schistosomiasis Station and all data collectors.

**Author Contributions**

Conceived and designed the experiments: SL XC BY HY. Performed the experiments: HX SL MG HY. Analyzed the data: HX SL XC BY MG HY CNO. Wrote the paper: HX SL XC BY MG HY CNO.

## References

- Chitsulo L, Engels D, Montresor A. (2000) The global status of schistosomiasis and its control. *Acta Tropica* 77: 41–51.
- Steinmann P, Keiser J, Bos R, Tanner M, Utzinger J (2006). Schistosomiasis and water resources development: Systematic review, meta-analysis, and estimates of people at risk. *The Lancet Infectious Disease* 6: 411–425.
- Gray DJ, McManus DP, Li Y, Williams GM, Berquist R, et al. (2010) Schistosomiasis elimination: lessons from the past guide the future. *The Lancet infectious diseases* 10: 733–736.
- Zheng H, Zhang LJ, Zhu R, Xu J, Li SZ, et al. (2012) Schistosomiasis situation in People's Republic of China in 2011 (in Chinese). *Chin J Schisto Control* 6: 621–626.
- Woolhouse ME. (1998) Patterns in parasite epidemiology: the peak shift. *Parasitol Today* 14: 428–34.
- Jordan P, Webbe G. (1969) Human schistosomiasis. *Human schistosomiasis*.
- Kabatereine NB, Kemiujumbi J, Ouma JH, Kariuki HC, Richter J, et al. (2004) Epidemiology and morbidity of Schistosoma mansoni infection in a fishing community along Lake Albert in Uganda. *Trans R Soc Trop Med Hyg* 98: 711–8.
- Deribe K, Eldaw A, Hadziabdi S, Kailie E, Omer MD, et al. (2011) High prevalence of urinary schistosomiasis in two communities in South Darfur: implication for interventions. *Parasit Vectors* 4: 14.
- Guo JG, Ross AG, Lin DD, Williams GM, Chen HG, et al. (2001) A baseline study on the importance of bovines for human Schistosoma japonicum infection around Poyang Lake, China. *Am J Trop Med Hyg* 65: 272–8.
- Hao Y, Wu XH, Zheng H, Wang LY, Guo JG, et al. (2007) Schistosomiasis situation in People's Republic of China in 2006 (in Chinese). *Chin J Schisto Control* 06: 401–404.
- Mone H, Fournier A. (1994) Effects of Snail-Conditioned Water on Survival and Host-Searching Behavior of Schistosome Miracidia. *Animal Behaviour* 48: 1–8.
- Gazzinelli A, Bethony J, Fraqa LA, LoVerde PT, Correa-Oliveira R, et al. (2001) Exposure to Schistosoma mansoni infection in a rural area of Brazil. I: water contact. *Trop Med Int Health* 6: 126–35.
- Kloos H. (1995) Human behavior, health education and schistosomiasis control: a review. *Soc Sci Med* 40: 1497–1511.
- Seto EY, Lee YJ, Liang S, Zhong B. (2007) Individual and village-level study of water contact patterns and Schistosoma japonicum infection in mountainous rural China. *Trop Med Int Health* 12: 1199–209.
- Utzinger J, Zhou XN, Chen MG, Bergquist R. (2005) Conquering schistosomiasis in China: the long march. *Acta Trop* 96: 69–96.
- Wang LD, Chen HG, Guo JG, Zeng XJ, Hong XL, et al. (2009) A strategy to control transmission of Schistosoma japonicum in China. *N Engl J Med* 360:121–128.
- Chen YY, Liu JB, Huang XB, Cai SX, Su ZM, et al. (2014) New integrated strategy emphasizing infection source control to curb schistosomiasis japonica in a marshland area of Hubei province, China: Findings from an eight-year longitudinal survey. *PLOS ONE* 9(2): e89779
- Zhou YB, Liang S, Chen GX, Rea C, He ZG, et al. (2011) An integrated strategy for transmission control of schistosoma japonicum in a marshland area of China: findings from a five-year longitudinal survey and mathematical modeling. *Am J Trop Med Hyg* 85: 83–88.
- Hong XC, Xu XJ, Chen X, Li YS, Yu CH, et al. (2013) Assessing the effect of an integrated control strategy for schistosomiasis japonica emphasizing bovines in a marshland area of Hubei province, China: A cluster randomized trial. *PLoS Neglected Tropical Diseases* 7: e2122.
- Midzi N, Mtapuri-Zinyovera S, Masingire MP, Paul NH, Sangwene D, et al. (2011) Knowledge attitudes and practices of grade three primary schoolchildren in relation to schistosomiasis, soil transmitted helminthiasis and malaria in Zimbabwe. *BMC Infect Dis* 11: 169.
- He MZ, Wang AP, Xie YQ, Chen H, Zhang Y, et al. (2013) Knowledge and practice on schistosomiasis control of boatmen along Yangtze River (in Chinese). *Chin J Schisto Control* 2: 215–216.
- Chen HY, Hu J, Song KY, Xiong ZW, Hu GH, et al. (2008) Longitudinal observation of health education in the control of schistosomiasis for 16 years in students of heavy epidemic area in Poyang Lake region (in Chinese). *Chinese Journal of Zoonoses* 24: 1149–1152.
- Chen XY, Wang LY, Cai JM, Zhou XN, Zheng J, et al. (2005) Schistosomiasis control in China: the impact of a 10-year World Bank Loan Project (1992–2001). *Bull World Health Organ* 83: 43–8.
- Wang S, Carlton EJ, Chen L, Liu Y, Spear RC, et al. (2013) Evaluation of an educational intervention on villagers' knowledge, attitude and behaviour regarding transmission of Schistosoma japonicum in Sichuan province, China. *Acta Trop* 127: 226–35.
- Hotez PJ, Molyneux DH, Fenwick A, Ottesen E, Ehrlich Sachs S, et al. (2006) Incorporating a rapid-impact package for neglected tropical diseases with programs for HIV/AIDS, tuberculosis, and malaria. *PLoS Med* 3: e102.
- Sun LP, Liang YS, Tian ZX, Huang YX, Hong QB, et al. (2009) Mid-term evaluation of health education for prevention control of schistosomiasis in Jiangsu Province (in Chinese). *Chin J Schisto Control* 3: 212–216.
- Wang Y, Xiao X, Zheng PP, Abu A, Fu H. (2009) Application and development of protection motivation theory in individual behavior change (in Chinese). *Chinese Journal of Health Education* 25: 853–855.
- Shen GJ, Zhang SQ, Liu DB, Li QY. (2000) Study on the relationship between the knowledge and behavior in health education in schistosomiasis control (in Chinese). *Chinese Journal of Behavioral Medical Science* 9: 401–403.
- Wei WY, Yuan LP, Jiang QX, Peng AG, Zhou DR. (2000) Studies on health education intervention to reduce unsafe water contacts in primary school students (in Chinese). *Chin J Schisto Control* 12: 143–145.
- Lewis JE, Malow RM, Ireland SJ. (1997) HIV/AIDS risk in heterosexual college students. A review of a decade of literature. *J Am Coll Health* 45: 147–58.
- Pan XH, Yang JZ, Xu Y, Zou Y, Chen G, et al. (2008) Study on AIDS related risk sexual behaviors and influential factors among college students (in Chinese). *Chinese School Health* 29: 701–703.
- Gao YF. (2008) A medical anthropological review of HIV/AIDS prevention researches (in Chinese). *Journal of Guangxi University for Nationalities* 30: 56–60.
- Rogers R (1983) Cognitive and physiological processes in fear appeals and attitude change: A revised theory of protection motivation. *Social psychology: A sourcebook*, ed. J. . Cacioppo and R. . Petty, New York: Guilford Press.
- Rogers RW. (1975) Protection Motivation Theory of Fear Appeals and Attitude-Change. *Journal of Psychology* 91: 93–114.
- Schwarzer R (1992) Self-efficacy in the adoption and maintenance of health behaviors: Theoretical approaches and a new model. Hemisphere Publishing Corp Press.
- Chen X, Lunn S, Deveaux L, Li X, Brathwaite N, et al. (2009) A cluster randomized controlled trial of an adolescent HIV prevention program among Bahamian youth: effect at 12 months post-intervention. *AIDS Behav* 13: 499–508.
- Chen X, Stanton B, Gomez P, Lunn S, Deveaux L, et al. (2010) Effects on condom use of an HIV prevention programme 36 months postintervention: a cluster randomized controlled trial among Bahamian youth. *Int J STD AIDS* 21: 622–30.
- Gong J, Stanton B, Lunn S, Deveaux L, Li X, et al. (2009) Effects Through 24 Months of an HIV/AIDS Prevention Intervention Program Based on Protection Motivation Theory Among Preadolescents in the Bahamas. *Pediatrics* 123: E917–E928.
- Milne S, Sheeran P, Orbell S. (2000) Prediction and intervention in health-related behavior: A meta-analytic review of protection motivation theory. *Journal of Applied Social Psychology* 30: 106–143.
- Tulloch H, Robert R, D'Angelo MS, Plotnikoff RC, Morrino L, et al. (2009) Predicting short and long-term exercise intentions and behaviour in patients with coronary artery disease: A test of protection motivation theory. *Psychology and Health* 24: 255–269.
- MacDonell K, Chen X, Yan Y, Li F, Gong J, et al. (2013) A protection motivation theory-based scale for tobacco research among Chinese youth. *J Addict Res Ther* 4: 154.
- Prentice-Dunn S, Rogers RW. (1986) Protection motivation theory and preventive health: Beyond the health belief model. *Health education research* 1: 153–161.
- Floyd DL, Prentice-Dunn S, Rogers RW. (2000) A meta-analysis of research on protection motivation theory. *Journal of Applied Social Psychology* 30: 407–429.
- Tu ZW, Dai YH, Mao GX, Zhu HG, Zhang YH. (2007) Analysis of acute infection of schistosoma japonicum in Hubei Province (in Chinese). *Chin J Schisto Control* 19: 208–211.
- Ministry of Health of the People's Republic of China. (2005) Issuance (trial) of "The technical solutions of oncomelania surveillance, oncomelania control, disease surveillance, chemotherapy of Schistosomiasis Control Project" from Office of the Ministry of Health (in Chinese). [cited 2014 Mar 20]; Available: <http://www.moh.gov.cn/mohbgt/pw10502/200804/27261.shtml>.
- Macdonell K, Chen X, Yan Y, Li Y, Gong J, et al. (2013) A Protection Motivation Theory-Based Scale for Tobacco Research among Chinese Youth. *J Addict Res Ther* 4: 154.
- Yan Y, Jacques-Tiura AJ, Chen X, Xie N, Chen J, et al. (2014) Application of the Protection Motivation Theory in predicting cigarette smoking among adolescents in China. *Addict Behav* 39: 181–8.
- Gryseels B, Polman K, Clerinx J, Kestens L. (2006) Human schistosomiasis. *Lancet* 368:1106–1118.
- Good BJ. (1996) Mental health consequences of displacement and resettlement. *Economic and Political Weekly* 31: 1504–1508.
- Chitsulo L, Engels D, Montresor A, Savioli L. (2000) The global status of schistosomiasis and its control. *Acta tropica* 77: 41–51.
- Sönmez SF, Graef AR. (1998) Determining future travel behavior from past travel experience and perceptions of risk and safety. *Journal of Travel Research* 37: 171–177.
